# Supplementary material
Source: PubMed Central journal article supplement (PMC3624747)
Supplement: NIHMS444005-supplement-ESI.pdf [file NIHMS444005-supplement-ESI.pdf]

## Supporting Information

# Tobacco mosaic virus rods and spheres as supramolecular high-relaxivity MRI contrast agents

*Michael A. Bruckman<sup>1</sup>, Stephen Hern<sup>1</sup>, Kai Jiang<sup>1</sup>, Chris Flask<sup>1,2</sup>, Xin Yu<sup>1,2</sup>, Nicole F.  
Steinmetz<sup>1,2,3\*</sup>*

Department of <sup>1</sup>Biomedical Engineering, <sup>2</sup>Radiology, <sup>3</sup>Materials Science and Engineering,  
Case Western Reserve University, 10900 Euclid Ave., Cleveland, OH 44106, USA.

\* **Corresponding author:** Prof. Nicole F. Steinmetz, Department of Biomedical Engineering,  
Radiology, Materials Science and Engineering, Case Western Reserve University School of  
Medicine, 10900 Euclid Avenue, Cleveland, OH 44106, USA, phone: 216-368-5590, email:  
nicole.steinmetz@case.edu

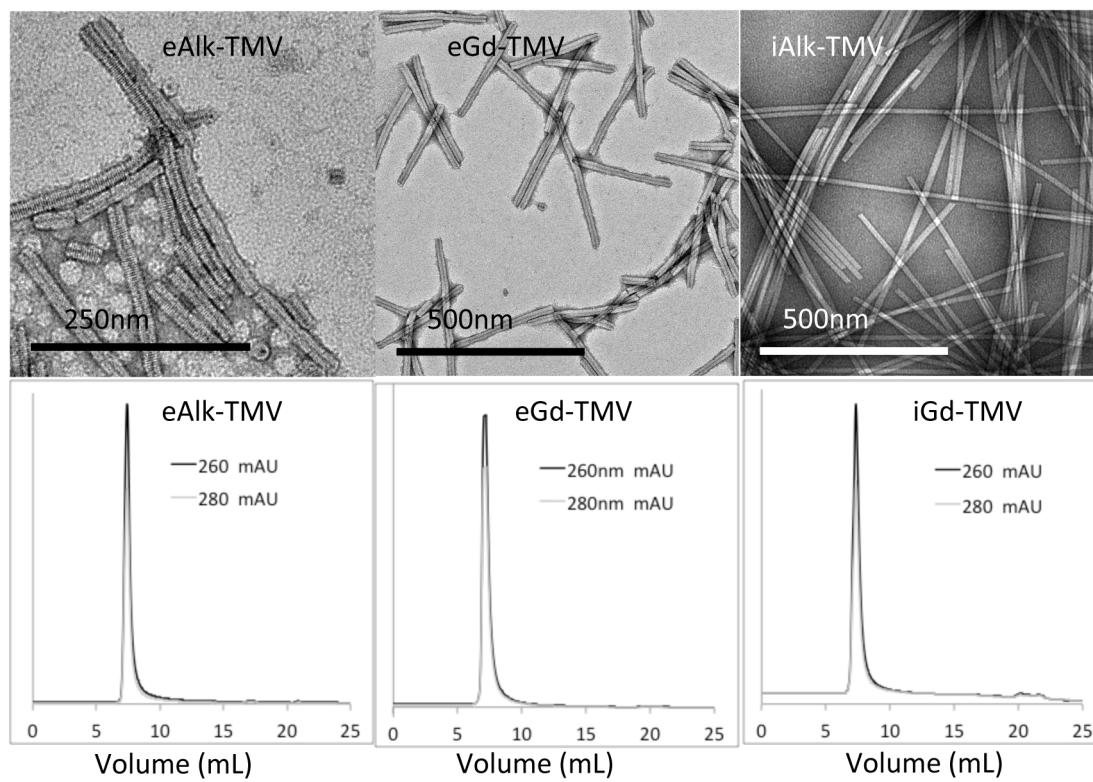

**Supporting Figure 1** TEM and SEC images of eAlk-TMV, iAlk-TMV and eGd-TMV.

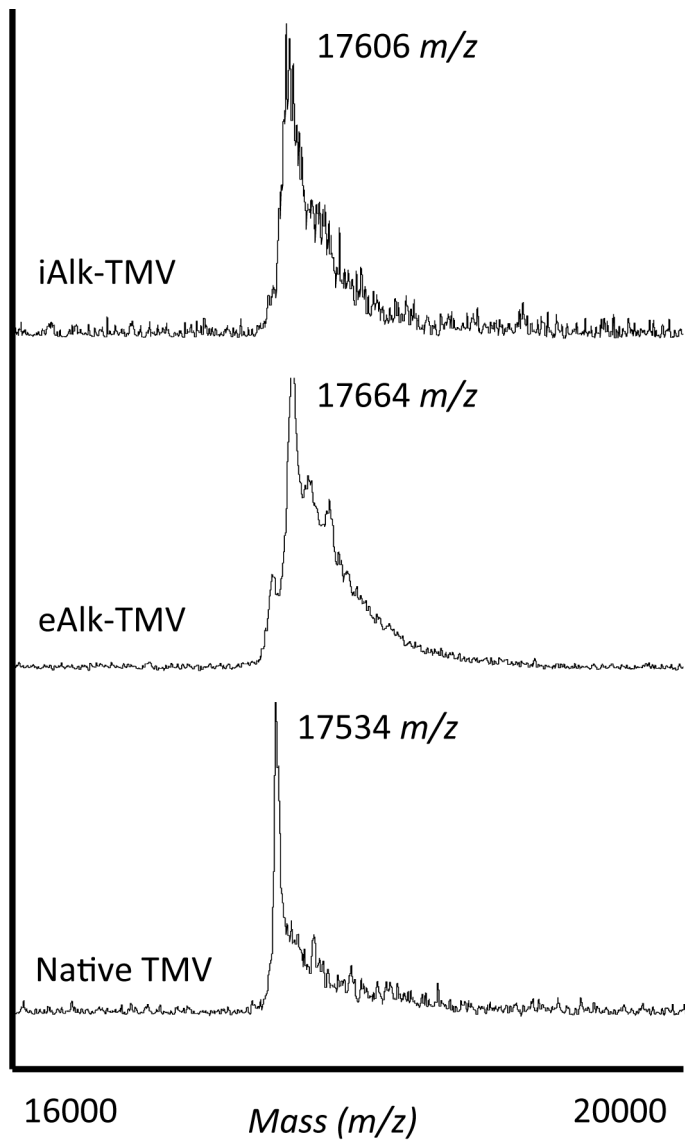

**Supporting Figure 2** MALDI-TOF MS of Native-TMV, eAlk-TMV and iAlk-TMV.

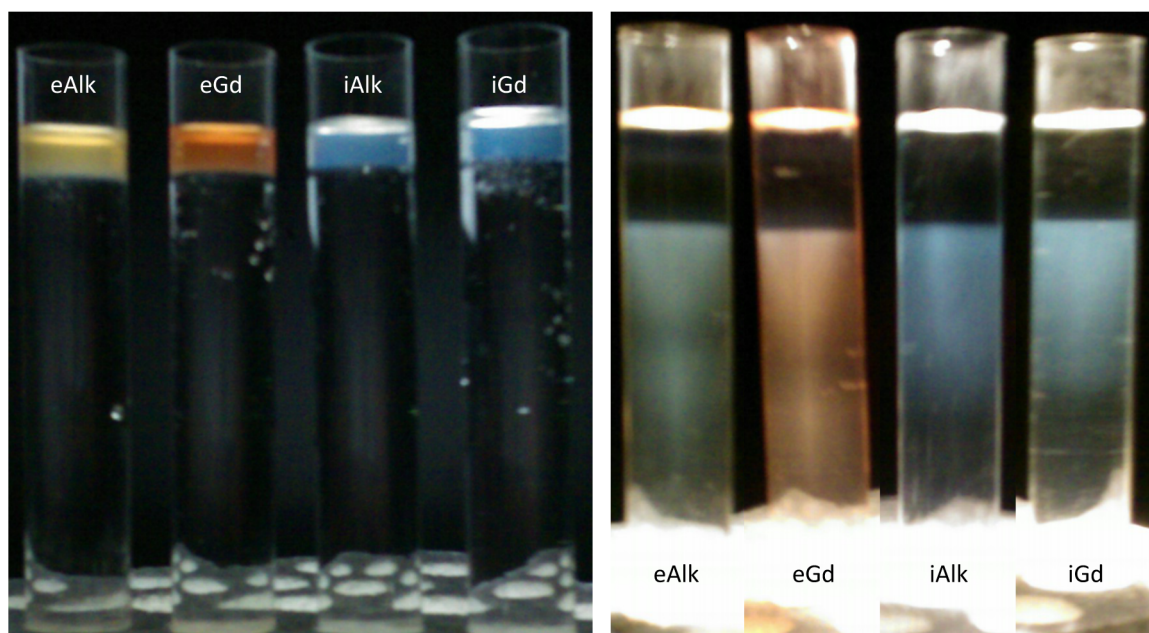

**Supporting Figure 3** Before (left) and after (right) images of sucrose gradient density purifications of (from left to right) eAlk-TMV, eGd-TMV, iAlk-TMV, and iGd-TMV.

i4 B 15s (Combined)  
Apr 24, 2012 14:40:08

Effective Diameter: 176.3 nm  
Polydispersity: 0.053  
Avg. Count Rate: 298.1 kcps  
Baseline Index: 8.1/ 99.30%  
Elapsed Time: 00:05:00

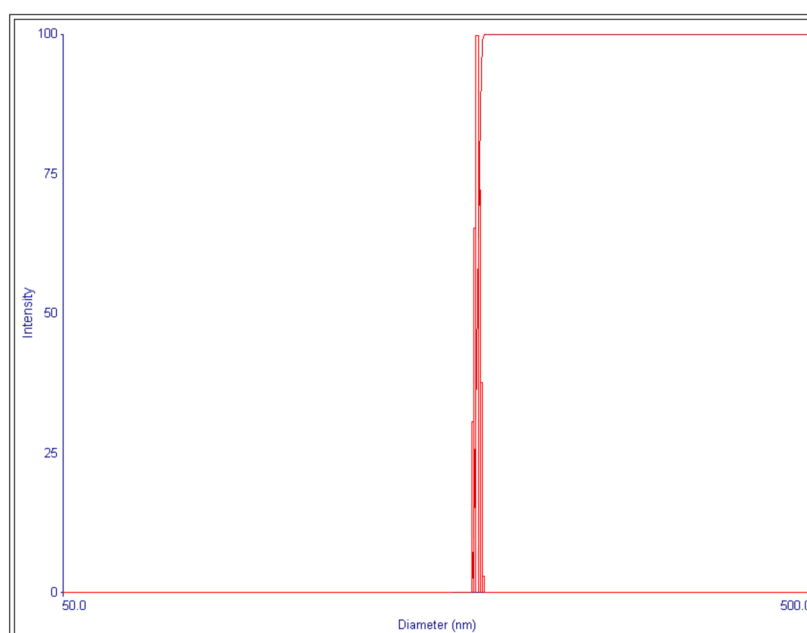

**Supporting Figure 4** Dynamic light scattering data of iGd-SNPs formed from iGd-TMV used in this paper.

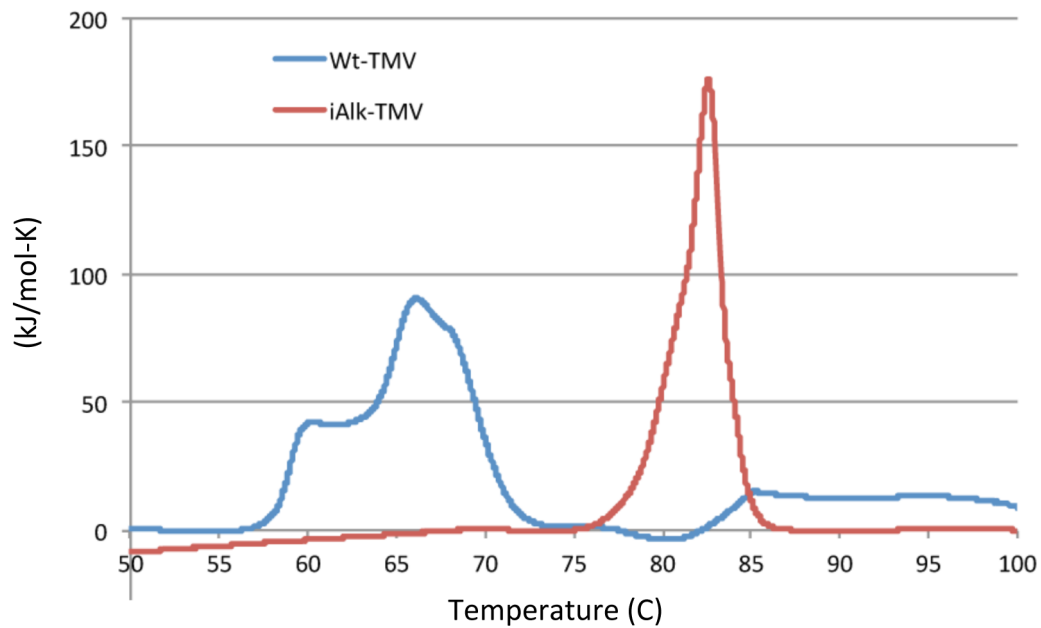

**Supporting Figure 5** NanoDSC analysis of native-TMV and iAlk-TMV showing an increase in stability of iAlk-TMV over native-TMV.

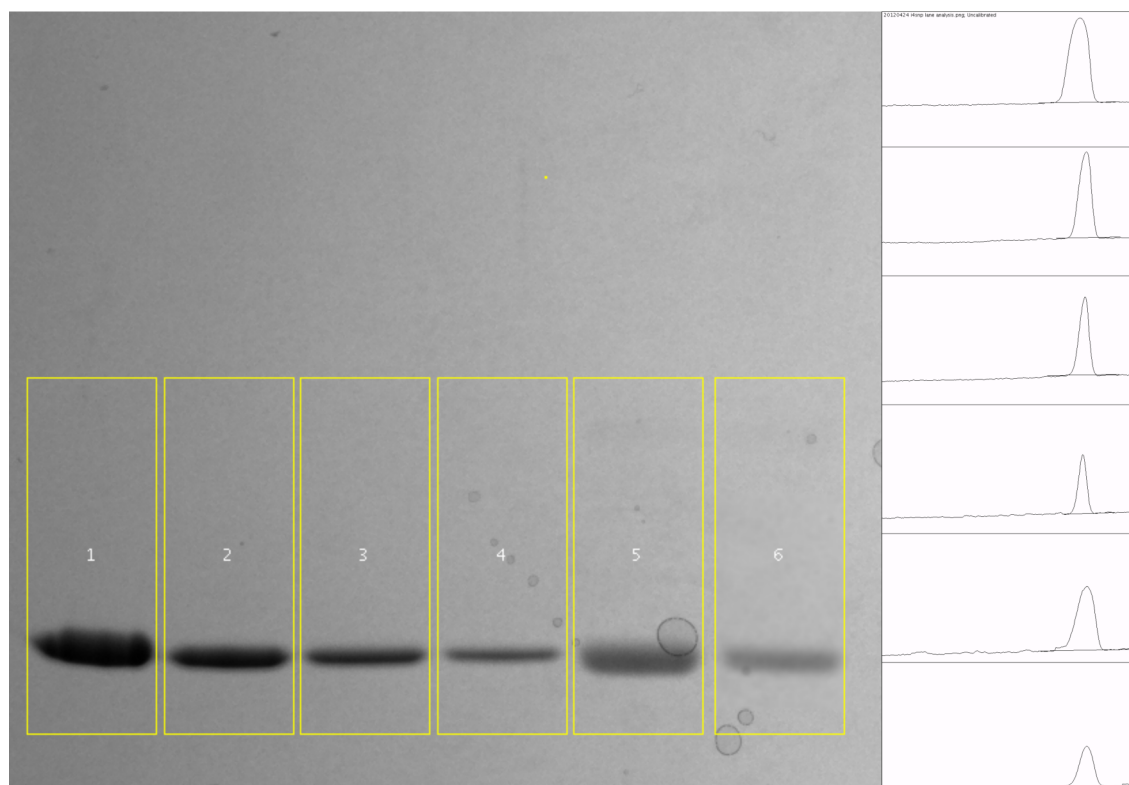

**Supporting Figure 6** SDS-PAGE of denatured TMV samples and subsequent lane analysis to determine the protein concentration of iGd-SNPs. Lane assignments: Native TMV at (1) 1.0

mg/ml, (2) 0.5 mg/ml, (3) 0.25 mg/ml, (4) 0.125 mg/ml, and iGd-SNP at (5) 2x dilution and (6) 4x dilution.

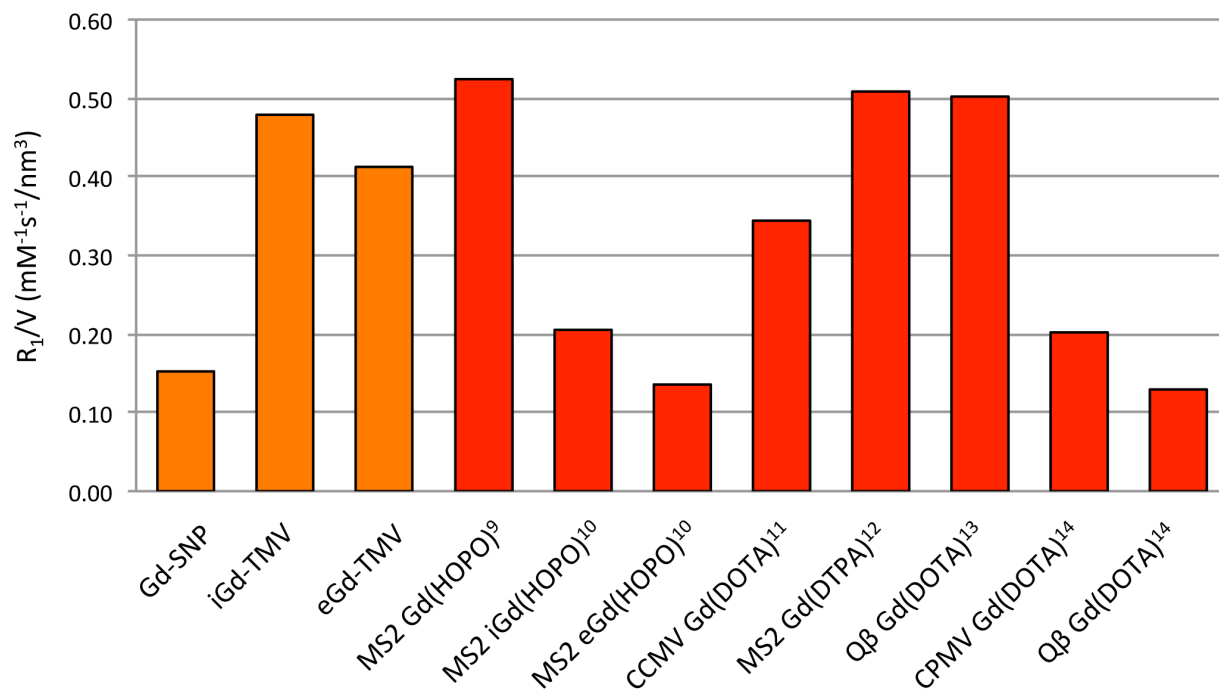

**Supporting Figure 7** Summary comparing relaxivity per volume ( $R_1/V$ ) of viral nanoparticle MRI contrast agents. References match paper order.
